# Supplementary material
Source: ML conference proceedings conference paper supplement (https://proceedings.mlr.press/v119/wang20v.html)
Supplement: Supplementary file [file wang20v-supp.pdf]

## Supplementary A: proof of Theorems

Here we give the proofs for Lemma 1 and Theorems 1 and 2. We also introduce Corollary 1, which is the global  $\mathcal{H}_\infty$  version of Lemma 1.

### Proof of Lemma 1

*Proof of Lemma 1.* We first show that (10a) - (10b) is a sufficient condition for global stability when  $\gamma_\pi$  is the global Lipschitz constant. From the assumption, we have

$$\begin{aligned} \|\delta\|_{\ell_\infty} &\leq \gamma_\Delta \|\alpha\|_{\ell_\infty} \\ &= \gamma_\Delta \|\Phi_{\alpha u} u + \Phi_{\alpha w} w + \Phi_{\alpha \delta} \delta\|_{\ell_\infty} \\ &\leq \gamma_\Delta \|\Phi_{\alpha \delta}\|_{\mathcal{L}_1} \|\delta\|_{\ell_\infty} + \gamma_\Delta \|\Phi_{\alpha u} u + \Phi_{\alpha w} w\|_{\ell_\infty}. \end{aligned}$$

From condition (10a), we can bound the  $\ell_\infty$  norm of  $\delta$  as

$$\|\delta\|_{\ell_\infty} \leq \frac{\gamma_\Delta}{1 - \beta_1} \|\Phi_{\alpha u} u + \Phi_{\alpha w} w\|_{\ell_\infty}. \quad (16)$$

Then, we have

$$\begin{aligned} \|\mathbf{y}\|_{\ell_\infty} &= \|\Phi_{\mathbf{y} \delta} \delta + \Phi_{\mathbf{y} u} u + \Phi_{\mathbf{y} w} w\|_{\ell_\infty} \quad (17a) \\ &\leq \|\Phi_{\mathbf{y} \delta}\|_{\mathcal{L}_1} \|\delta\|_{\ell_\infty} + \|\Phi_{\mathbf{y} u} u + \Phi_{\mathbf{y} w} w\|_{\ell_\infty} \quad (17b) \end{aligned}$$

$$\begin{aligned} &\leq \frac{\gamma_\Delta}{1 - \beta_1} \|\Phi_{\mathbf{y} \delta}\|_{\mathcal{L}_1} \|\Phi_{\alpha u} u + \Phi_{\alpha w} w\|_{\ell_\infty} \\ &\quad + \|\Phi_{\mathbf{y} u} u + \Phi_{\mathbf{y} w} w\|_{\ell_\infty} \quad (17c) \end{aligned}$$

$$\begin{aligned} &\leq \left( \|\Phi_{\mathbf{y} u}\|_{\mathcal{L}_1} + \frac{\gamma_\Delta \|\Phi_{\mathbf{y} \delta}\|_{\mathcal{L}_1} \|\Phi_{\alpha u}\|_{\mathcal{L}_1}}{1 - \beta_1} \right) \|u\|_{\ell_\infty} \\ &\quad + \|\Phi_{\mathbf{y} w} w\|_{\ell_\infty} + \frac{\gamma_\Delta}{1 - \beta_1} \|\Phi_{\mathbf{y} \delta}\|_{\mathcal{L}_1} \|\Phi_{\alpha w} w\|_{\ell_\infty} \quad (17d) \end{aligned}$$

$$\begin{aligned} &\leq \gamma_\pi \left( \|\Phi_{\mathbf{y} u}\|_{\mathcal{L}_1} + \frac{\gamma_\Delta \|\Phi_{\mathbf{y} \delta}\|_{\mathcal{L}_1} \|\Phi_{\alpha u}\|_{\mathcal{L}_1}}{1 - \beta_1} \right) \|y\|_{\ell_\infty} \\ &\quad + \left( \|\Phi_{\mathbf{y} w}\|_{\mathcal{L}_1} + \frac{\gamma_\Delta \|\Phi_{\mathbf{y} \delta}\|_{\mathcal{L}_1} \|\Phi_{\alpha w}\|_{\mathcal{L}_1}}{1 - \beta_1} \right) \|w\|_{\ell_\infty} \quad (17e) \end{aligned}$$

From condition (10b), we can bound the  $\ell_\infty$  norm of  $\mathbf{y}$  as

$$\begin{aligned} \|\mathbf{y}\|_{\ell_\infty} &\leq \frac{1}{1 - \beta_2} \left( \|\Phi_{\mathbf{y} w}\|_{\mathcal{L}_1} + \frac{\gamma_\Delta \|\Phi_{\mathbf{y} \delta}\|_{\mathcal{L}_1} \|\Phi_{\alpha w}\|_{\mathcal{L}_1}}{1 - \beta_1} \right) \|w\|_{\ell_\infty}. \quad (18) \end{aligned}$$

This shows that the  $\ell_\infty$  to  $\ell_\infty$  gain from  $\mathbf{w}$  to  $\mathbf{y}$  is bounded. We can use similar procedure to show that the  $\ell_\infty$  to  $\ell_\infty$  gain from  $\mathbf{w}$  to  $\mathbf{u}$ ,  $\delta$ ,  $\alpha$  are all bounded. This shows the input-output stability of the closed loop system when the global Lipschitz constant of the neural network policy is  $\gamma_\pi$ .

Next, we consider the case where  $\gamma_\pi$  is valid only over a local region  $\|y\|_{\ell_\infty} \leq y_\infty$ . From (10c), we know that the right-hand-side of (18) is less than or equal to  $y_\infty$  given  $\|w\|_{\ell_\infty} \leq w_\infty$ . Thus,  $\mathbf{y}$  will never go outside the local region  $\|y\|_{\ell_\infty} \leq y_\infty$  where we calculate the Lipschitz constant  $\gamma_\pi$  for any valid perturbation (7). This completes the proof.  $\square$

### The global $\mathcal{H}_\infty$ version of Lemma 1

The following Corollary is the global  $\mathcal{H}_\infty$  version of Lemma 1.

**Corollary 1.** *Consider a stable LTI plant (1) - (4) interconnected with a neural network policy (5) and a dynamic uncertainty block (6) as shown in Figure 1. Assume that the persistent perturbation  $\mathbf{w}$  lies in the set given by (7). Suppose that the neural network policy  $u = \pi(y)$  has a finite  $\ell_2$  to  $\ell_2$  gain  $\gamma_\pi$  for all  $y$ , and the uncertainty block  $\Delta$  has the property  $\|\delta\|_{\ell_2} \leq \gamma_\Delta \|\alpha\|_{\ell_2}$ . If the following conditions hold:*

$$\beta_1 = \gamma_\Delta \|\Phi_{\alpha \delta}\|_{\mathcal{H}_\infty} < 1 \quad (19a)$$

$$\beta_2 = \gamma_\pi \left[ \|\Phi_{\mathbf{y} u}\|_{\mathcal{H}_\infty} + \frac{\gamma_\Delta}{1 - \beta_1} \|\Phi_{\mathbf{y} \delta}\|_{\mathcal{H}_\infty} \|\Phi_{\alpha u}\|_{\mathcal{H}_\infty} \right] < 1 \quad (19b)$$

then the closed loop system in Figure 1 is  $\ell_2$  to  $\ell_2$  input-output stable.

### Proof of Theorem 1

The proof of Theorem 1 relies on the concept of a positively invariant set, which is defined as follows:

**Definition 1** (from (Khalil, 2002)). *A set  $\mathcal{M}$  is said to be a positively invariant set with respect to the dynamics  $x[t+1] = f(x[t])$  if*

$$x[0] \in \mathcal{M} \implies x[t] \in \mathcal{M}, \forall t \geq 0. \quad (20)$$

The proof of Theorem 1 is given as follows:

*Proof of Theorem 1.* We use mathematical induction to show that  $\mathcal{I} = \{(y, u, \alpha, \delta) \mid |y| \preceq \bar{y}, |u| \preceq \bar{u}, |\alpha| \preceq \bar{\alpha}, |\delta| \preceq \bar{\delta}\}$  is a positively invariant set of the closed loop dynamical system if the three conditions of the theorem are given. From the zero initial condition assumption in (4), we have

$$|y[0]| = |D_w w[0]| \preceq \text{abs}(D_w) \bar{w} \preceq \text{abs}(\Phi_{\mathbf{y} w}) \bar{w} \preceq \bar{y}$$

where the last inequality is from the third condition of the theorem. Then from the first condition of the theorem, we

have  $|u[0]| \leq \bar{u}$ . Similarly, we have

$$\begin{aligned} |\alpha[0]| &= |D_{\alpha u}u[0] + D_{\alpha w}w[0]| \\ &\leq \text{abs}(D_{\alpha u})\bar{u} + \text{abs}(D_{\alpha w})\bar{w} \\ &\leq \text{abs}(\Phi_{\alpha u})\bar{u} + \text{abs}(\Phi_{\alpha w})\bar{w} \\ &\leq \bar{\alpha}. \end{aligned}$$

Then from the second condition of the theorem, we have  $|\delta[0]| \leq \bar{\delta}$ . This shows  $(y[0], u[0], \alpha[0], \delta[0]) \in \mathcal{I}$ . Assume that we have  $(y[t], u[t], \alpha[t], \delta[t]) \in \mathcal{I}$  for all  $0 \leq t < T$ . From the second row of the matrix equation (9), we have

$$\begin{aligned} |y[T]| &= \left| \sum_{\tau=0}^{\infty} \Phi_{yu}[\tau]u[T-\tau] + \Phi_{yw}[\tau]w[T-\tau] \right. \\ &\quad \left. + \Phi_{y\delta}[\tau]\delta[T-\tau] \right| \\ &\leq \sum_{\tau=0}^{\infty} |\Phi_{yu}[\tau]u[T-\tau]| + |\Phi_{yw}[\tau]w[T-\tau]| \\ &\quad + |\Phi_{y\delta}[\tau]\delta[T-\tau]| \\ &\leq \sum_{\tau=0}^{\infty} |\Phi_{yu}[\tau]|\bar{u} + |\Phi_{yw}[\tau]|\bar{w} + |\Phi_{y\delta}[\tau]|\bar{\delta} \\ &= \text{abs}(\Phi_{yu})\bar{u} + \text{abs}(\Phi_{yw})\bar{w} + \text{abs}(\Phi_{y\delta})\bar{\delta} \\ &\leq \bar{y} \end{aligned}$$

where the last inequality is from the third condition of the theorem. Similarly, we can derive  $|\alpha[T]| \leq \bar{\alpha}$  from the third row of the matrix equation (9). The first two conditions of Theorem 1 then imply  $|u[T]| \leq \bar{u}$  and  $|\delta[T]| \leq \bar{\delta}$ , and thus we have  $(y[T], u[T], \alpha[T], \delta[T]) \in \mathcal{I}$ . Using mathematical induction, we conclude that  $(y[t], u[t], \alpha[t], \delta[t]) \in \mathcal{I}$  for all  $t \geq 0$  and the closed loop feedback signals and state are bounded within the set specified by the theorem.  $\square$

## Proof of Theorem 2

*Proof of Theorem 2.* We need to show that when (10a) - (10c) and the locally Lipschitz continuous assumption of Lemma 1 are satisfied, we can always construct a quadruplet  $(\bar{y}, \bar{u}, \bar{\alpha}, \bar{\delta})$  satisfying the three conditions of Theorem 1. Consider the following equation:

$$\begin{aligned} \begin{bmatrix} y_{ref} \\ \alpha_{ref} \end{bmatrix} &= \begin{bmatrix} 1 - \gamma_{\Delta}\|\Phi_{\alpha\delta}\|_{\mathcal{L}_1} & \gamma_{\Delta}\|\Phi_{y\delta}\|_{\mathcal{L}_1} \\ \gamma_{\pi}\|\Phi_{\alpha u}\|_{\mathcal{L}_1} & 1 - \gamma_{\pi}\|\Phi_{yu}\|_{\mathcal{L}_1} \end{bmatrix} \times \\ &\quad \begin{bmatrix} \|\Phi_{yw}\|_{\mathcal{L}_1} \\ \|\Phi_{\alpha w}\|_{\mathcal{L}_1} \end{bmatrix} \frac{w_{\infty}}{(1 - \beta_1)(1 - \beta_2)}, \end{aligned} \quad (23)$$

with scalar variables  $y_{ref}$  and  $\alpha_{ref}$ . For any  $w_{\infty} > 0$ , we have  $y_{ref} > 0$  and  $\alpha_{ref} > 0$  because all the elements in (23) are positive according to the conditions (10a) - (10b). In addition, we can show that  $y_{ref}$  defined in (23) is equivalent to the left-hand-side of (10c). Therefore, we have  $y_{ref} \leq y_{\infty}$  from (10c) – this means that  $y_{ref}$  is always contained within the region where we calculate the local

Lipschitz constant of the neural network policy  $\gamma_{\pi}$ . It is then straightforward to verify that  $\bar{y} = y_{ref}\mathbf{1}$ ,  $\bar{u} = \gamma_{\pi}y_{ref}\mathbf{1}$ ,  $\bar{\alpha} = \alpha_{ref}\mathbf{1}$ ,  $\bar{\delta} = \gamma_{\Delta}\alpha_{ref}\mathbf{1}$  satisfy the first two conditions of Theorem 1 given the locally Lipschitz continuous assumption of Lemma 1.

For the third condition of Theorem 1, it can be verified that (23) is a solution to the following inequality:

$$\begin{aligned} &\begin{bmatrix} \|\Phi_{yw}\|_{\mathcal{L}_1} \\ \|\Phi_{\alpha w}\|_{\mathcal{L}_1} \end{bmatrix} w_{\infty} \\ &\leq \begin{bmatrix} 1 - \gamma_{\pi}\|\Phi_{yu}\|_{\mathcal{L}_1} & -\gamma_{\Delta}\|\Phi_{y\delta}\|_{\mathcal{L}_1} \\ -\gamma_{\pi}\|\Phi_{\alpha u}\|_{\mathcal{L}_1} & 1 - \gamma_{\Delta}\|\Phi_{\alpha\delta}\|_{\mathcal{L}_1} \end{bmatrix} \begin{bmatrix} y_{ref} \\ \alpha_{ref} \end{bmatrix}, \end{aligned}$$

which can be rearranged into

$$\begin{aligned} &\begin{bmatrix} \|\Phi_{yw}\|_{\mathcal{L}_1} \\ \|\Phi_{\alpha w}\|_{\mathcal{L}_1} \end{bmatrix} w_{\infty} + \begin{bmatrix} \|\Phi_{yu}\|_{\mathcal{L}_1} & \|\Phi_{y\delta}\|_{\mathcal{L}_1} \\ \|\Phi_{\alpha u}\|_{\mathcal{L}_1} & \|\Phi_{\alpha\delta}\|_{\mathcal{L}_1} \end{bmatrix} \begin{bmatrix} \gamma_{\pi}y_{ref} \\ \gamma_{\Delta}\alpha_{ref} \end{bmatrix} \\ &\leq \begin{bmatrix} y_{ref} \\ \alpha_{ref} \end{bmatrix}. \end{aligned} \quad (24)$$

Finally, we note the following inequality

$$\text{abs}(\Phi)\mathbf{1} \leq \|\Phi\|_{\mathcal{L}_1}\mathbf{1} \quad (25)$$

from the fact that the  $\mathcal{L}_1$  norm is selecting the maximum row sum. Therefore, we have

$$\begin{aligned} &\text{abs} \left( \begin{bmatrix} \Phi_{yw} \\ \Phi_{\alpha w} \end{bmatrix} \right) \bar{w} + \text{abs} \left( \begin{bmatrix} \Phi_{yu} & \Phi_{y\delta} \\ \Phi_{\alpha u} & \Phi_{\alpha\delta} \end{bmatrix} \right) \begin{bmatrix} \bar{u} \\ \bar{\delta} \end{bmatrix} \\ &\leq \begin{bmatrix} \|\Phi_{yw}\|_{\mathcal{L}_1}\mathbf{1} \\ \|\Phi_{\alpha w}\|_{\mathcal{L}_1}\mathbf{1} \end{bmatrix} w_{\infty} + \text{abs} \left( \begin{bmatrix} \Phi_{yu} & \Phi_{y\delta} \\ \Phi_{\alpha u} & \Phi_{\alpha\delta} \end{bmatrix} \right) \begin{bmatrix} \gamma_{\pi}y_{ref}\mathbf{1} \\ \gamma_{\Delta}\alpha_{ref}\mathbf{1} \end{bmatrix} \\ &\leq \begin{bmatrix} \|\Phi_{yw}\|_{\mathcal{L}_1}\mathbf{1} \\ \|\Phi_{\alpha w}\|_{\mathcal{L}_1}\mathbf{1} \end{bmatrix} w_{\infty} \\ &\quad + \begin{bmatrix} \|\Phi_{yu}\|_{\mathcal{L}_1}\mathbf{1} & \|\Phi_{y\delta}\|_{\mathcal{L}_1}\mathbf{1} \\ \|\Phi_{\alpha u}\|_{\mathcal{L}_1}\mathbf{1} & \|\Phi_{\alpha\delta}\|_{\mathcal{L}_1}\mathbf{1} \end{bmatrix} \begin{bmatrix} \gamma_{\pi}y_{ref} \\ \gamma_{\Delta}\alpha_{ref} \end{bmatrix} \\ &\leq \begin{bmatrix} y_{ref}\mathbf{1} \\ \alpha_{ref}\mathbf{1} \end{bmatrix} \\ &= \begin{bmatrix} \bar{y} \\ \bar{\alpha} \end{bmatrix}. \end{aligned}$$

We can see that if the conditions of Lemma 1 hold, we can always construct a quadruplet  $(\bar{y}, \bar{u}, \bar{\alpha}, \bar{\delta})$  satisfying all the three conditions of Theorem 1. The converse is not true. Therefore, Theorem 1 can be applied on a strictly larger class of problems than Lemma 1.  $\square$

## Supplementary B: cart pole model

We consider a cart-pole problem with  $\eta$  being the displacement of the cart and  $\theta$  the angle of the pole. The dynamics

is given by

$$\begin{aligned}\ddot{\eta} &= \left( \frac{4}{3}(M+m)l - ml\cos^2(\theta) \right)^{-1} \\ &\quad \left( \frac{4}{3}ml^2\dot{\theta}^2\sin(\theta) - mgl\sin(\theta)\cos(\theta) + \frac{4}{3}lu \right) \\ \ddot{\theta} &= \left( \frac{4}{3}(M+m)l - ml\cos^2(\theta) \right)^{-1} \\ &\quad \left( -ml\dot{\theta}^2\sin(\theta)\cos(\theta) + (M+m)g\sin(\theta) - \cos(\theta)u \right).\end{aligned}$$

We use the default model parameters from stable baselines:  $g = 9.8$ ,  $M = 1$ ,  $m = 0.1$ , and  $l = 0.5$ . Using Euler discretization, the nonlinear discrete time cart pole model is given by

$$\begin{aligned}\eta[t+1] &= \eta[t] + \tau\dot{\eta}[t] \\ \dot{\eta}[t+1] &= \dot{\eta}[t] + \tau\ddot{\eta}[t] \\ \theta[t+1] &= \theta[t] + \tau\dot{\theta}[t] \\ \dot{\theta}[t+1] &= \dot{\theta}[t] + \tau\ddot{\theta}[t]\end{aligned}$$

with sampling time  $\tau = 0.02$ .

### Linearized model with no uncertainty

Define the state vector  $x = [\eta \quad \dot{\eta} \quad \theta \quad \dot{\theta}]^\top$ . The linearized cart-pole model around the origin is given by

$$x[t+1] = Ax[t] + Bu[t], \quad y[t] = x[t] + D_w w[t]$$

with

$$\begin{aligned}A &= \begin{bmatrix} 1 & \tau & 0 & 0 \\ 0 & 1 & \frac{-3mg\tau}{4M+m} & 0 \\ 0 & 0 & 1 & \tau \\ 0 & 0 & \frac{3(M+m)g\tau}{(4M+m)l} & 1 \end{bmatrix}, \\ B &= \begin{bmatrix} 0 \\ \frac{4\tau}{4M+m} \\ 0 \\ \frac{-3\tau}{(4M+m)l} \end{bmatrix}, \quad D_w = \begin{bmatrix} 0 \\ 0 \\ 1 \\ 0 \end{bmatrix}.\end{aligned}\quad (28)$$

Note from  $D_w$  that we have an one dimensional perturbation on the pole angle measurement. The requirement is to certify that the actual pole angle is within the user-specified limit, that is,

$$|x_3[t]| \leq x_{lim}, \quad \forall t \geq 0. \quad (29)$$

As explained in the Case Study Section, the assumptions of one dimensional perturbation and one dimensional state constraint are made for the ease of illustrating the result. Algorithm 1 can be applied to systems with multi-dimensional perturbations with user-specified requirement on both state, measurement, and control action.

### Learned model using data driven approach

When the model equation is unknown in the first place, we can collect the data from the simulator and fit the data to a model. Let  $x^{(i,j)}[t]$  be the state vector  $x$  at time  $t$  for the  $i$ -th episode from the  $j$ -th bootstrap sample, for  $j = 0, 1, \dots, 100$ . For the  $j$ -th bootstrap run, we solve the following least square problem to obtain the system matrices  $A^{(j)}$  and  $B^{(j)}$ :

$$\begin{aligned}\text{minimize}_{A^{(j)}, B^{(j)}} & \sum_{i=1}^N \sum_{t=0}^{T-1} \|x^{(i,j)}[t+1] - A^{(j)}x^{(i,j)}[t] \\ & - B^{(j)}u^{(i,j)}[t]\|_2^2\end{aligned}\quad (30)$$

with  $T = 30$ ,  $x$  from the simulator, and  $u$  randomly generated. We then find a pair of non-negative matrices  $\Delta_A$  and  $\Delta_B$  such that

$$|A^{(j)} - A^{(0)}| \preceq \Delta_A, \quad |B^{(j)} - B^{(0)}| \preceq \Delta_B, \quad (31)$$

for  $j = 1, \dots, 100$  to over-approximate the modeling error of the nominal model  $(A^{(0)}, B^{(0)})$ . The learned model used by our experiment in the Case Study Section is then given by

$$\begin{aligned}x[t+1] &= A^{(0)}x[t] + B^{(0)}u[t] + \delta[t] \\ y[t] &= x[t] + D_w w[t] \\ \alpha[t] &= \begin{bmatrix} I \\ 0 \end{bmatrix} x[t] + \begin{bmatrix} 0 \\ I \end{bmatrix} u[t] = \begin{bmatrix} x[t] \\ u[t] \end{bmatrix} \\ |\delta[t]| &\preceq \begin{bmatrix} \Delta_A & \Delta_B \end{bmatrix} |\alpha[t]| = \Gamma_\Delta |\alpha[t]|,\end{aligned}$$

where  $\Gamma_\Delta = \begin{bmatrix} \Delta_A & \Delta_B \end{bmatrix}$  is the non-negative matrix used in Algorithm 1.
